# Supplementary material for: Layered double hydroxide nanoparticles to enhance organ-specific targeting and the anti-proliferative effect of cisplatin
Source: Royal Society of Chemistry journal article supplement (doi:10.1039/c4tb01989j), 2015-01-01
Supplement: c4tb01989j1.pdf [file c4tb01989j1.pdf]

*Supporting information*

## Layered Double Hydroxide Nanoparticles to Enhance Organ-Specific Target and Anti-Proliferative Effect of Cisplatin

Yue-Ming Kuo<sup>a,‡</sup>, Yaswanth Kuthatia,<sup>‡</sup> Ranjith Kumar Kankala<sup>a</sup>, Pei-Ru Wei<sup>a</sup>, Ching-Feng Weng<sup>a</sup>,

Chen-Lun Liu<sup>a</sup>, Ping-Jyun Sung<sup>a,b</sup>, Chung-Yuan Mou<sup>c</sup> and Chia-Hung Lee<sup>a\*</sup>.

<sup>a</sup>Department of Life Science and Institute of Biotechnology, National Dong Hwa University, Hualien, 974, Taiwan.

<sup>b</sup>Graduate Institute of Marine Biotechnology, National Dong Hwa University, Pingtung 944, Taiwan.

<sup>c</sup>Department of Chemistry, National Taiwan University, Taipei, 106, Taiwan.

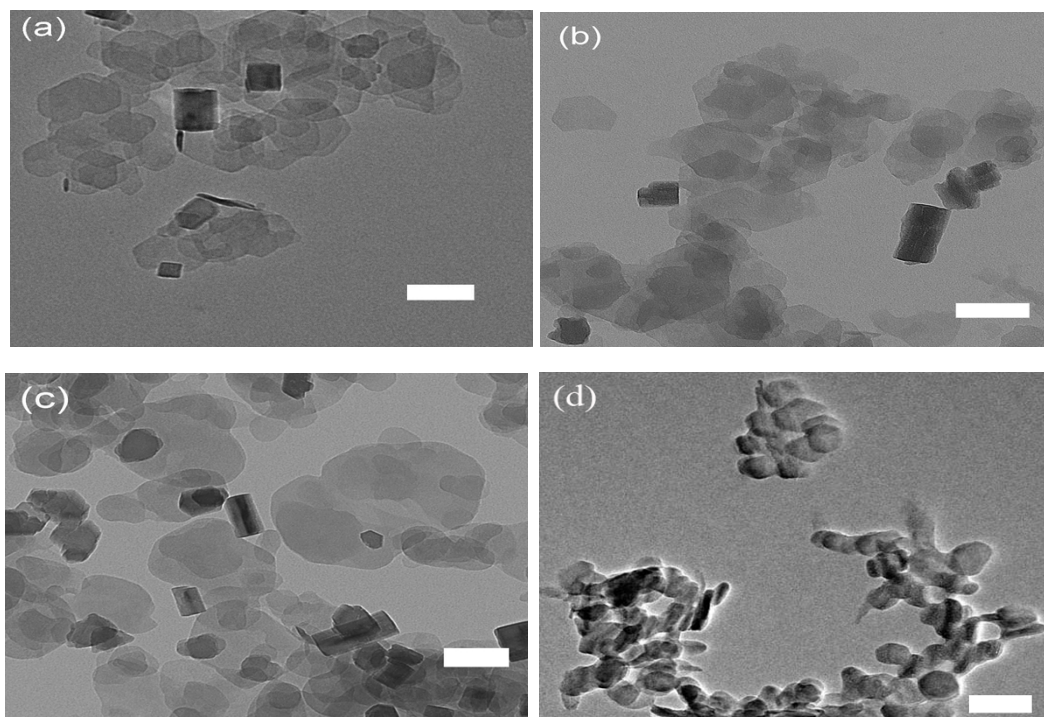

**Figure S1.** TEM images of (a) LDH-NH<sub>2</sub>, (b) LDH-NH-COOH, (c) LDH-NH-PEG5000 and (d) LDH-NH-COOH-CP. The morphology of LDH-NH-COOH-CP samples showed high stability after treatment with blood plasma for 24 h. Scale bars-100 nm.

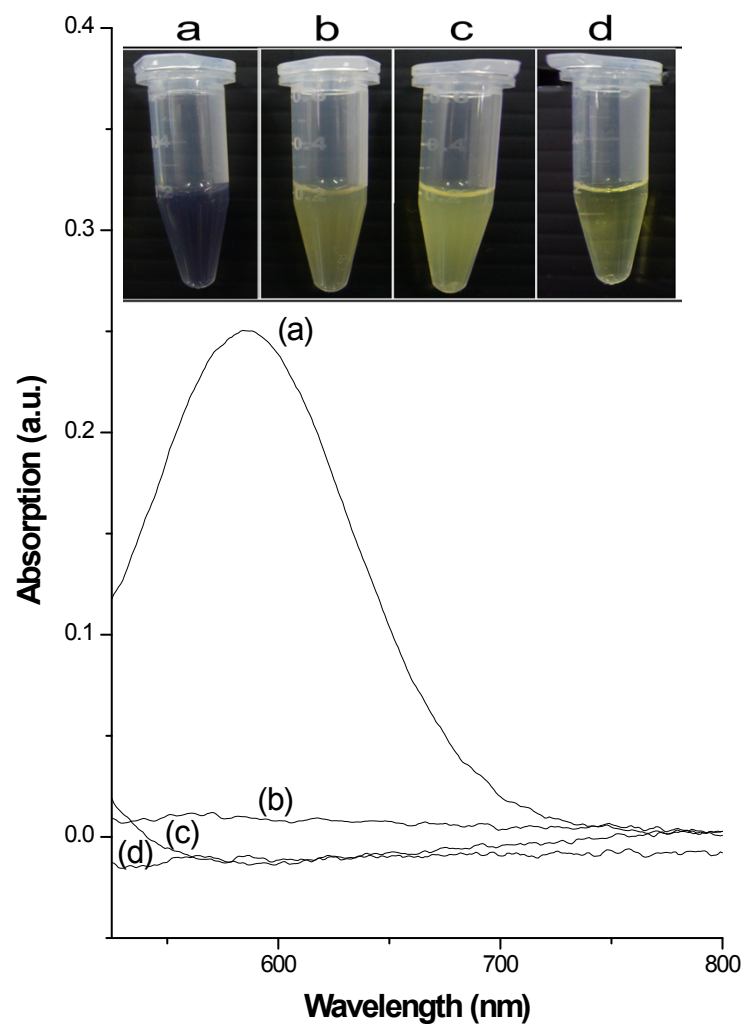

**Figure S2.** UV-Vis spectra and white-light sample images of ninhydrin treated (a) LDH-NH<sub>2</sub>, (b) LDH-NH-PEG5000, (c) LDH-NH-COOH samples and (d) Ninhydrin solution alone.

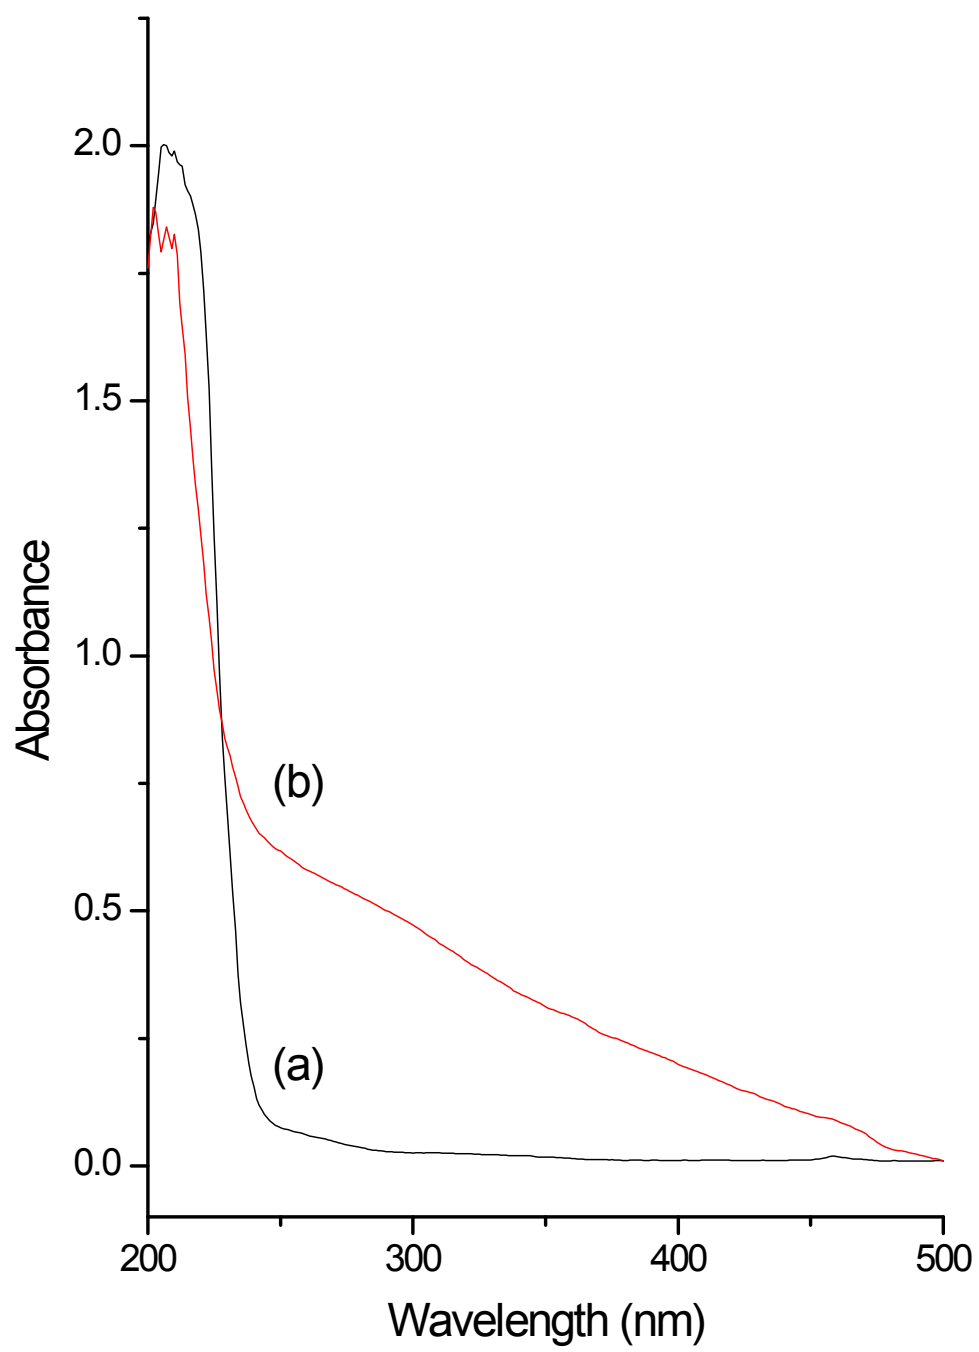

**Figure S3.** UV-Vis spectra of (a) hydroxo-cisplatin, and LDH-NH-COOH-CP samples.

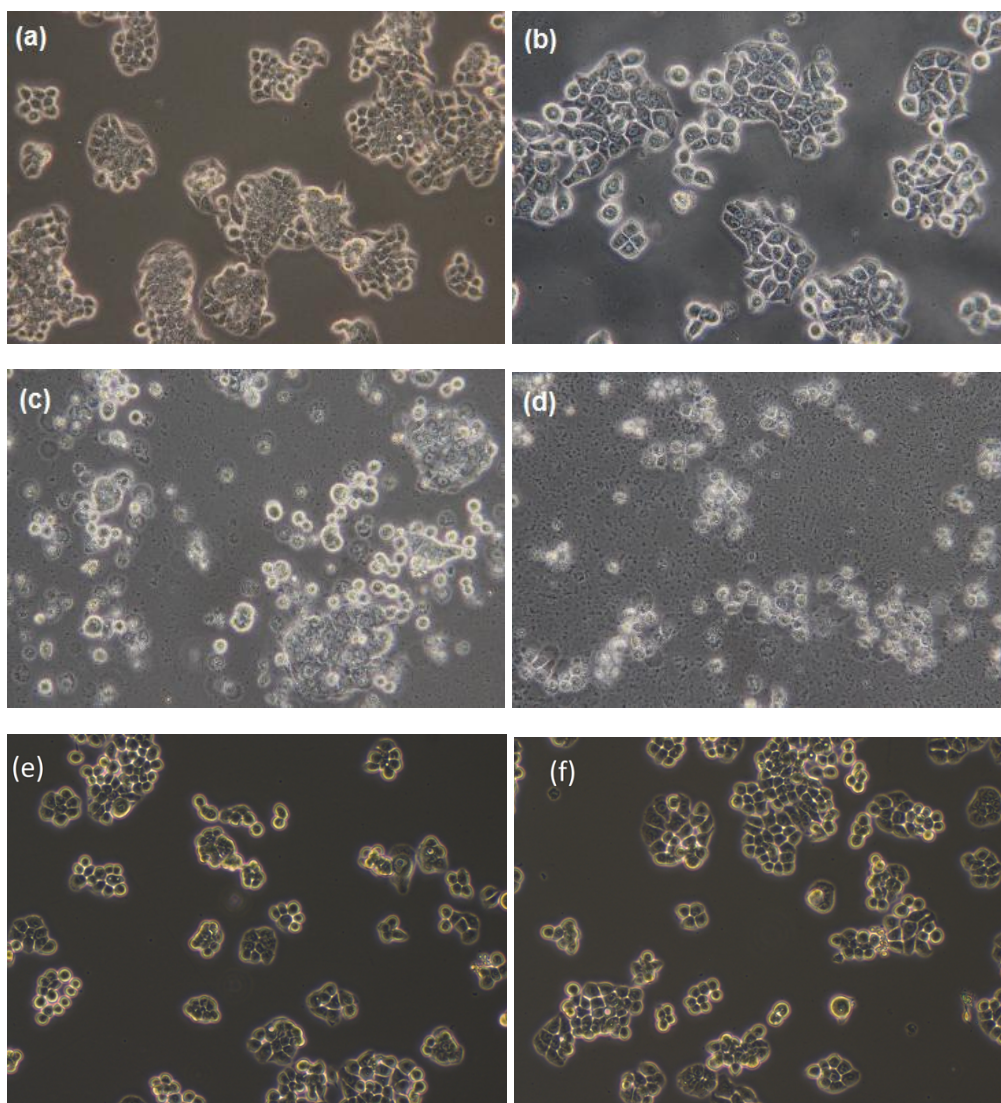

**Figure S4.** Cellular morphology after treated with (a) Control ( $0 \mu\text{g mL}^{-1}$ ), (b)  $10 \mu\text{g mL}^{-1}$ , (c)  $50 \mu\text{g mL}^{-1}$ , and (d)  $100 \mu\text{g mL}^{-1}$  of LDH-NH-COOH-CP (e) LDH-NH-PEG5000 ( $100 \mu\text{g mL}^{-1}$ ), (f) LDH-NH-COOH ( $100 \mu\text{g mL}^{-1}$ ) nanoparticles for 24 h. Then, the cell cytotoxicity was detected by microscopic morphological examination.

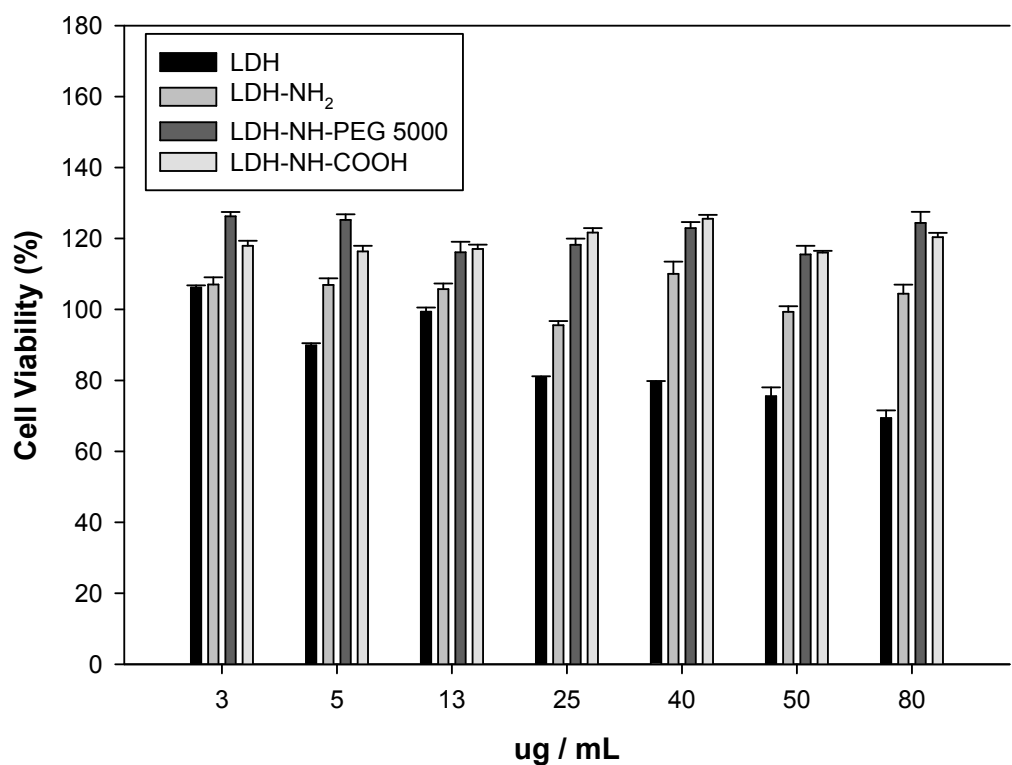

**Figure S5.** MTT cytotoxicity assay of HT-29 cells treated with LDH, LDH-NH<sub>2</sub>, LDH-NH-PEG5000, and LDH-NH-COOH samples at various concentration ranges (3, 5, 13, 25, 40, 50, 80  $\mu\text{g mL}^{-1}$ ) for 24 h. Cells without added nanoparticles were taken as the control experiment and the viability was set as 100%. The final report data were expressed as a percentage of the control (mean $\pm$  standard deviation).

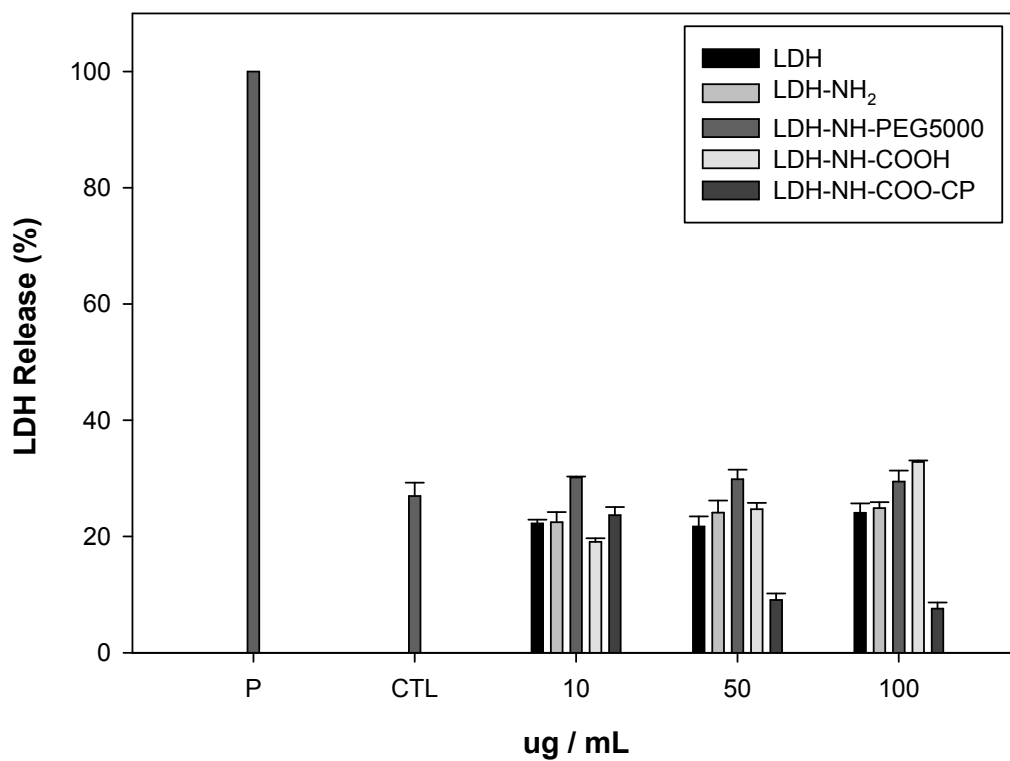

**Figure S6.** The Lactate dehydrogenase assay of HT-29 cells treated with LDH, LDH-NH<sub>2</sub>, LDH-NH-PEG5000, LDH-NH-COOH, and LDH-NH-COOH-CP samples at 10, 50, and 100 µg mL<sup>-1</sup> for 24 h. Samples without nanoparticle treatment were defined as the control (CTL) experiment and Triton X-100 (1 %) treated sample was defined as the positive (P) experiment.

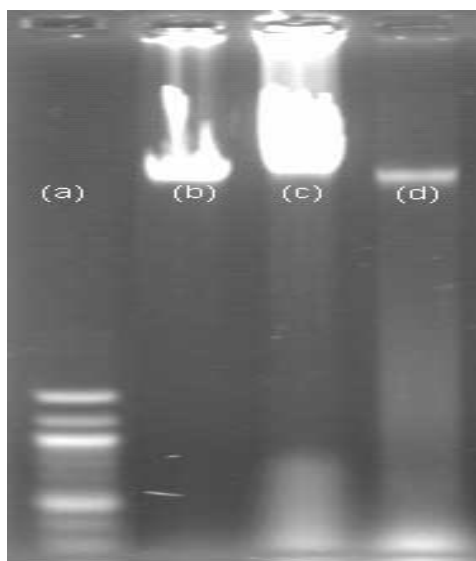

**Figure S7.** Induction of DNA fragmentation of LDH-NH-COOH-CP nanoparticles to colon cancer cells (HT-29): (a) 100 bp DNA marker, (b)  $0 \mu\text{g mL}^{-1}$ , (c)  $5 \mu\text{g mL}^{-1}$ , and d)  $10.3 \mu\text{g mL}^{-1}$  of LDH-NH<sub>2</sub>-COOH-CP treatments.

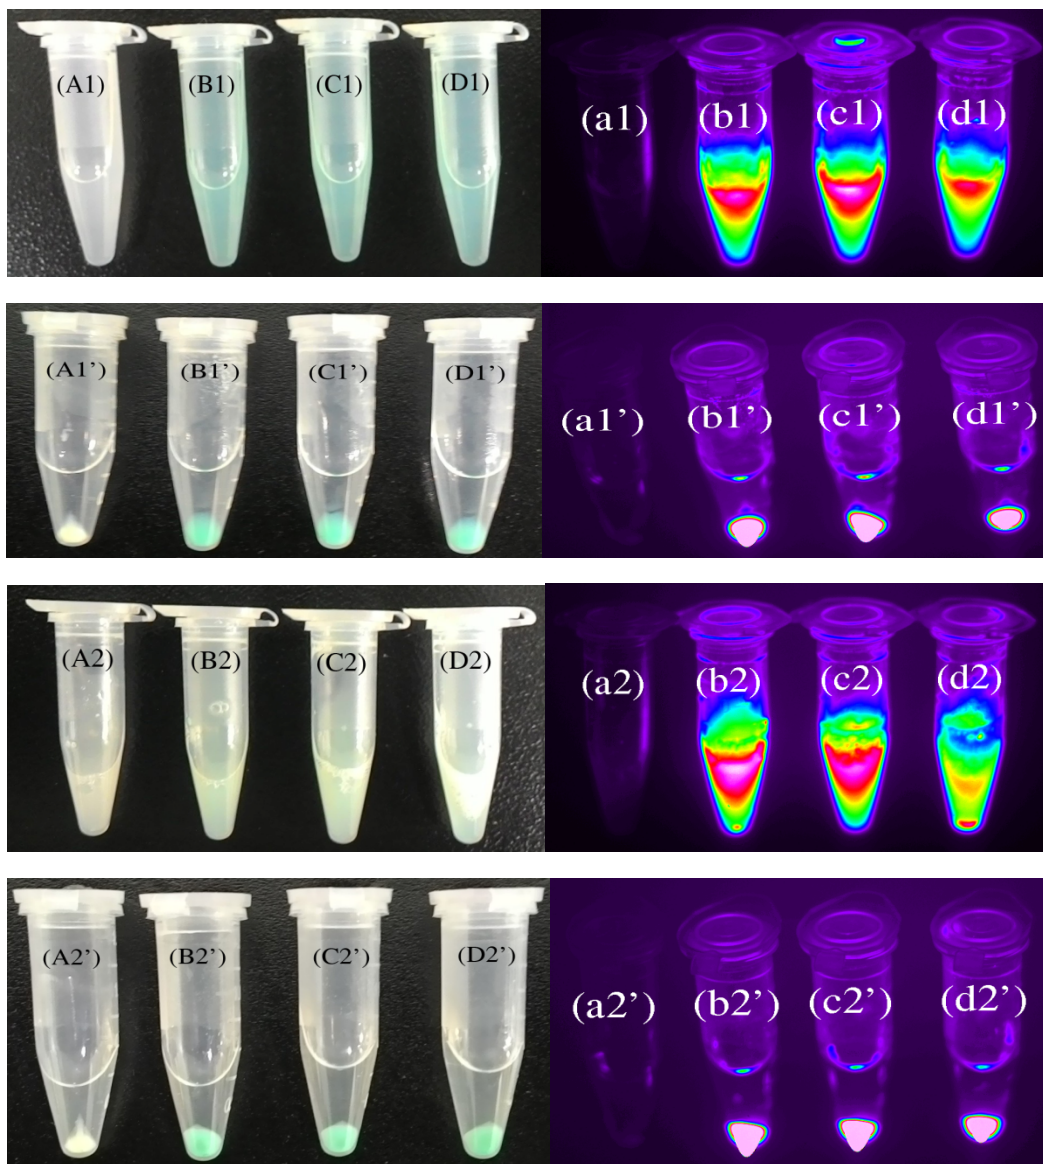

**Figure S8.** White-light (left samples) and fluorescent images (right samples) of the centrifuged (represented ‘) and suspended samples after incubation in PBS (labeled 1) and plasma (labeled 2) for 3 h. (A) LDH, (B) LDH-NH<sub>2</sub>, (C) LDH-NH-PEG5000, (D) LDH-NH-COOH.
